# Supplementary material for: Integrating High throughput Sequencing into Survey Design Reveals Turnip Yellows Virus and Soybean Dwarf Virus in Pea (Pisum Sativum) in the United Kingdom
Source: MDPI journal article supplement (doi:10.3390/v13122530), 2021-12-16
Supplement: s1 [file s1]

*Supplementary Table S4: Central estimates and 95% confidence intervals for prevalence estimates based on testing 30 4-plant pools*

| 4-plant<br>pools +ve | Prevalence (%) |                         |       |
|----------------------|----------------|-------------------------|-------|
|                      | Estimate       | 95% confidence interval |       |
| 0                    | 0              | 0                       | 2.47  |
| 1                    | 0.84           | 0.02                    | 4.61  |
| 2                    | 1.71           | 0.21                    | 6.04  |
| 3                    | 2.6            | 0.53                    | 7.42  |
| 4                    | 3.51           | 0.95                    | 8.77  |
| 5                    | 4.46           | 1.44                    | 10.11 |
| 6                    | 5.43           | 1.99                    | 11.47 |
| 7                    | 6.43           | 2.58                    | 12.84 |
| 8                    | 7.46           | 3.22                    | 14.23 |
| 9                    | 8.53           | 3.91                    | 15.66 |
| 10                   | 9.64           | 4.63                    | 17.12 |
| 11                   | 10.79          | 5.41                    | 18.62 |
| 12                   | 11.99          | 6.22                    | 20.17 |
| 13                   | 13.24          | 7.08                    | 21.78 |
| 14                   | 14.54          | 7.99                    | 23.46 |
| 15                   | 15.91          | 8.96                    | 25.2  |
| 16                   | 17.35          | 9.98                    | 27.04 |
| 17                   | 18.87          | 11.06                   | 28.97 |
| 18                   | 20.47          | 12.21                   | 31.01 |
| 19                   | 22.18          | 13.44                   | 33.18 |
| 20                   | 24.02          | 14.75                   | 35.52 |
| 21                   | 25.99          | 16.17                   | 38.04 |
| 22                   | 28.14          | 17.69                   | 40.8  |
| 23                   | 30.5           | 19.36                   | 43.86 |
| 24                   | 33.13          | 21.2                    | 47.3  |
| 25                   | 36.11          | 23.24                   | 51.26 |
| 26                   | 39.57          | 25.55                   | 55.98 |
| 27                   | 43.77          | 28.23                   | 61.88 |
| 28                   | 49.19          | 31.46                   | 69.93 |
| 29                   | 57.27          | 35.58                   | 82.96 |
| 30                   | 100            | 44.48                   | 100   |
