# Supplementary material for: Integrating High throughput Sequencing into Survey Design Reveals Turnip Yellows Virus and Soybean Dwarf Virus in Pea (Pisum Sativum) in the United Kingdom
Source: MDPI journal article supplement (doi:10.3390/v13122530), 2021-12-16
Supplement: s1 [file s1]

Supplementary Table S2. Table shows the reads per kilobase of transcript per million mapped reads (RPKM) for each sample tested by HTS, Equation  $RPKM = (10^9 \times C)/(N \times L)$ , where C is the number of unique high-quality reads that mapped to the transcript, N is the total number of unique high-quality reads in the library, and L is the length of the transcript. The table also gives the GenBank accession number for the representative sequence. Sample type- BFS- bulk field sample, ID-BFS- in depth bulk field sample, BS- bulked symptomatic samples, IS- individual symptomatic sample, and HI- historic isolate.

| Sample type | Virus         | TuYV        | TuYV       | SbDV        | PEMV-2      | PEMV-1      | PSbMV       | BYMV        | PEMV Sat | GenBank Accession Numbers for sequences obtained in this study |
|-------------|---------------|-------------|------------|-------------|-------------|-------------|-------------|-------------|----------|----------------------------------------------------------------|
|             | Accession     | NC_003743.1 | MN497802.1 | NC_003056.1 | NC_003853.1 | NC_003629.1 | NC_001671.1 | NC_003492.1 | U03564.1 |                                                                |
|             | Length        | 5641        | 5577       | 5853        | 4253        | 5706        | 9924        | 9532        | 717      |                                                                |
| BFS         | Ancaster      | 1.0         | 1.0        | 0.0         | 0.0         | 0.0         | 0.0         | 0.0         | 0.0      |                                                                |
| BFS         | Kidderminster | 0.0         | 0.0        | 0.0         | 0.0         | 0.0         | 0.0         | 0.0         | 0.0      |                                                                |
| BFS         | Long Sutton   | 0.0         | 0.0        | 0.0         | 0.0         | 0.0         | 0.0         | 0.0         | 0.0      |                                                                |
| BFS         | Lincoln       | 0.0         | 0.0        | 0.0         | 0.0         | 0.0         | 0.0         | 0.0         | 0.0      |                                                                |
| BFS         | Woodbridge    | 0.0         | 0.0        | 0.0         | 0.0         | 0.1         | 0.0         | 0.0         | 0.0      |                                                                |
| BFS         | Canterbury    | 5.4         | 36.7       | 0.0         | 0.0         | 0.5         | 1.0         | 0.2         | 0.0      | TuYV: OK030767                                                 |
| BFS         | Finavon       | 0.0         | 0.0        | 0.0         | 0.0         | 0.0         | 0.0         | 0.0         | 0.0      |                                                                |
| BFS         | Salisbury     | 0.0         | 0.2        | 0.0         | 776.4       | 2593.6      | 0.1         | 0.1         | 0.0      | PEMV-1: OK030715<br>PEMV-2: OK030729                           |
| BFS         | East Riding   | 0.9         | 2.1        | 0.0         | 0.0         | 0.0         | 0.0         | 0.0         | 0.0      | TuYV: OK030768                                                 |
| BFS         | Ulceby        | 5.7         | 21.9       | 0.0         | 11.0        | 0.6         | 0.0         | 0.0         | 10.0     | PEMV-2: OK030758<br>TuYV: OK030769                             |

|        |                 |      |       |     |       |       |     |     |     |                                                                          |
|--------|-----------------|------|-------|-----|-------|-------|-----|-----|-----|--------------------------------------------------------------------------|
| BFS    | Chatteris       | 58.1 | 242.6 | 0.2 | 0.0   | 0.7   | 0.3 | 0.4 | 0.0 | TuYV: OK030770                                                           |
| BFS    | Langtoft        | 6.4  | 33.9  | 0.4 | 311.9 | 0.8   | 0.7 | 0.7 | 0.0 | PEMV-2: OK030730<br>TuYV: OK030771                                       |
| BFS    | Louth           | 26.6 | 93.5  | 0.0 | 557.0 | 0.0   | 0.1 | 0.5 | 0.0 | PEMV-2: OK030731<br>TuYV: OK030772                                       |
| BFS    | Market Weighton | 56.5 | 287.2 | 2.2 | 23.5  | 0.0   | 0.1 | 0.1 | 0.0 | PEMV-2: OK030732<br>SbDV: OK030748<br>TuYV: OK030773                     |
| ID-BFS | Market Weighton | 58.4 | 280.9 | 3.4 | 22.5  | 0.2   | 0.2 | 0.3 | 0.0 | PEMV-2: OK030795<br>SbDV: OK030799<br>TuYV: OK030750                     |
| BS     | Market Weighton | 78.6 | 226.7 | 0.1 | 11.6  | 76.8  | 0.7 | 0.8 | 0.0 | PEMV-1: OK030716<br>PEMV-2: OK030796<br>TuYV: OK030774                   |
| BFS    | Perth           | 0.2  | 1.2   | 0.8 | 64.8  | 694.6 | 0.7 | 1.2 | 0.0 | PEMV-1: OK030717<br>PEMV-2: OK030735<br>SbDV: OK030749<br>TuYV: OK030775 |
| ID-BFS | Perth           | 0.1  | 1.2   | 1.2 | 63.9  | 735.2 | 0.6 | 1.0 | 0.0 | PEMV-1: OK030718                                                         |

|     |            |       |       |     |        |        |     |     |         |                                                                                 |
|-----|------------|-------|-------|-----|--------|--------|-----|-----|---------|---------------------------------------------------------------------------------|
|     |            |       |       |     |        |        |     |     |         | PEMV-2: OK030733<br>SbDV: OK030751<br>TuYV: OK030776                            |
| BFS | Wainfleet  | 9.1   | 43.1  | 0.0 | 425.0  | 10.7   | 0.0 | 0.0 | 444.1   | PEMV-1: OK030766<br>PEMV-2: OK030734<br>PEMV-satRNA: OK030761<br>TuYV: OK030777 |
| BS  | Wainfleet  | 172.0 | 593.3 | 0.1 | 5422.6 | 8825.0 | 0.1 | 0.2 | 15152.3 | PEMV-1: OK030719<br>PEMV-2: OK030736<br>PEMV-satRNA: OK030762<br>TuYV: OK030778 |
| BFS | Stoneleigh | 2.5   | 8.8   | 0.0 | 0.0    | 0.1    | 0.1 | 0.0 | 0.0     | TuYV: OK030779                                                                  |
| BFS | Eye        | 20.8  | 48.9  | 0.4 | 0.8    | 0.2    | 0.3 | 0.9 | 96.8    | PEMV-satRNA: OK030763<br>TuYV: OK030780                                         |
| BS  | Eye        | 100.9 | 802.5 | 0.0 | 209.9  | 0.5    | 0.1 | 0.2 | 0.0     | PEMV-2: OK030737<br>TuYV: OK030781                                              |
| BFS | Langton    | 55.6  | 273.3 | 0.2 | 140.1  | 0.4    | 0.1 | 0.3 | 0.0     | PEMV-2: OK030740                                                                |

|        |              |        |        |     |         |         |       |     |      |                                                                                    |
|--------|--------------|--------|--------|-----|---------|---------|-------|-----|------|------------------------------------------------------------------------------------|
|        |              |        |        |     |         |         |       |     |      | TuYV: OK030782                                                                     |
| BS     | Langton      | 130.5  | 533.9  | 0.4 | 0.1     | 0.7     | 0.3   | 0.2 | 0.0  | TuYV: OK030783                                                                     |
| BFS    | Chirnside    | 2.4    | 9.2    | 0.0 | 235.5   | 470.1   | 0.5   | 0.1 | 26.5 | PEMV-1: OK030720<br>PEMV-2: OK030738<br>PEMV-satRNA:<br>OK030760<br>TuYV: OK030784 |
| ID-BFS | Chirnside    | 3.1    | 9.2    | 0.1 | 247.0   | 503.0   | 0.4   | 0.4 | 24.7 | PEMV-1: OK030727<br>PEMV-2: OK030739<br>PEMV-satRNA:<br>OK030759<br>TuYV: OK030785 |
| IS     | Market Rasen | 0.6    | 0.5    | 0.0 | 0.0     | 0.6     | 0.0   | 0.0 | 0.0  | TuYVaRNA:<br>OK030786                                                              |
| IS     | Ramsey-1     | 2899.4 | 7769.4 | 0.2 | 26732.8 | 59323.1 | 0.0   | 0.0 | 0.0  | PEMV-1: OK030721<br>PEMV-2: OK030741<br>TuYV: OK030798                             |
| IS     | Ramsey-2     | 1794.7 | 7734.7 | 0.0 | 7533.2  | 0.7     | 0.0   | 0.4 | 0.0  | PEMV-2: OK030742<br>TuYV: OK030788                                                 |
| IS     | March        | 1659.2 | 4188.1 | 0.1 | 9861.7  | 15667.7 | 155.9 | 1.9 | 0.0  | PEMV-1: OK030722                                                                   |

|    |              |        |         |     |         |         |       |      |         |                                                                                                      |
|----|--------------|--------|---------|-----|---------|---------|-------|------|---------|------------------------------------------------------------------------------------------------------|
|    |              |        |         |     |         |         |       |      |         | PEMV-2: OK030743<br>PSbMV: OK030753<br>TuYV: OK030789<br>TuYVaRNA:<br>OK030787                       |
| IS | Ramsey-3     | 67.0   | 600.9   | 0.1 | 19040.5 | 39555.5 | 7.5   | 0.3  | 0.0     | PEMV-1: OK030723<br>PEMV-2: OK030744<br>PSbMV: OK030754<br>TuYV: OK030790                            |
| IS | Ramsey-4     | 6144.2 | 11323.7 | 0.0 | 3703.6  | 0.2     | 0.2   | 0.1  | 0.0     | PEMV-2: OK030728<br>TuYV: OK030791                                                                   |
| IS | The Deepings | 6454.4 | 15091.5 | 0.0 | 29754.0 | 38626.4 | 0.2   | 35.8 | 53.8    | PEMV-1: OK030724<br>PEMV-2: OK030745<br>PEMV-satRNA:<br>OK030764<br>BYMV: OK030755<br>TuYV: OK030792 |
| IS | Cambridge-1  | 3026.1 | 14705.9 | 0.5 | 12769.7 | 84.3    | 271.5 | 2.2  | 76062.0 | PEMV-1: OK030725<br>PEMV-2: OK030746<br>PSbMV: OK030756                                              |

|    |             |        |         |        |         |         |        |     |         |                                                                  |
|----|-------------|--------|---------|--------|---------|---------|--------|-----|---------|------------------------------------------------------------------|
|    |             |        |         |        |         |         |        |     |         | TuYV: OK030793                                                   |
| IS | Cambridge-2 | 0.2    | 0.2     | 0.0    | 28709.2 | 53909.8 | 0.0    | 0.1 | 25462.8 | PEMV-1: OK030726<br>PEMV-2: OK030747<br>PEMV-satRNA:<br>OK030765 |
| HI | East Anglia | 9920.7 | 16824.6 | 2752.9 | 7529.3  | 0.2     | 1595.3 | 0.5 | 0.0     | PSbMV: OK030757<br>SbDV: OK030752<br>TuYV: OK030794              |
