# Supplementary material for: Integrating High throughput Sequencing into Survey Design Reveals Turnip Yellows Virus and Soybean Dwarf Virus in Pea (Pisum Sativum) in the United Kingdom
Source: MDPI journal article supplement (doi:10.3390/v13122530), 2021-12-16
Supplement: s1 [file s1]

Supplementary Table S1. HTS and incidence results for site testing. Table shows the site name, sampling date, initial result from high-throughput sequencing (HTS) and the results from real-time RT-PCR testing. The incidence of virus is given as a percentage, alongside the upper and lower incidence values. Where no result is shown, samples were not tested.

[illegible]

|    |           |            |                                   |       |       |       |       |       |       |      |       |       |  |  |  |
|----|-----------|------------|-----------------------------------|-------|-------|-------|-------|-------|-------|------|-------|-------|--|--|--|
| 18 | Eye       | 17.07.2019 | TuYV, PEMV-satRNA                 | 93.33 | 68.08 | 99.83 |       |       |       |      |       |       |  |  |  |
| 19 | Langton   | 18.07.2019 | TuYV, PEMV-2                      | 86.67 | 59.69 | 98.34 |       |       |       | 28.2 | 17.09 | 43.25 |  |  |  |
| 20 | Chirnside | 24.07.2019 | TuYV, PEMV-1, PEMV-2, PEMV-satRNA | 27.77 | 16.27 | 42.99 | 37.15 | 21.63 | 56.58 | 40.8 | 23.55 | 62.15 |  |  |  |
