# Supplementary material for: Integrating High throughput Sequencing into Survey Design Reveals Turnip Yellows Virus and Soybean Dwarf Virus in Pea (Pisum Sativum) in the United Kingdom
Source: MDPI journal article supplement (doi:10.3390/v13122530), 2021-12-16

*Supplementary Figure S1: Central estimates and 95% confidence intervals for two different sizes of pools used to test 120 plants*

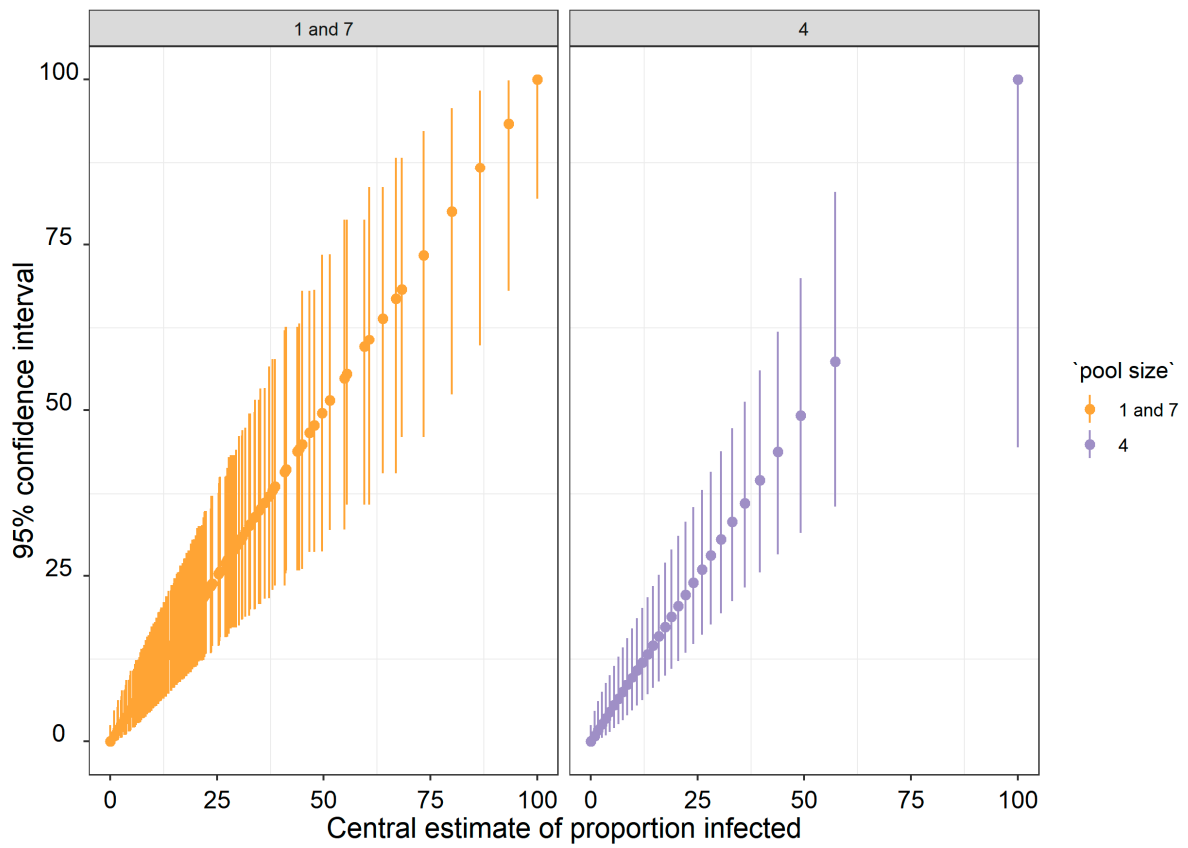

Supplement: s1 [file s1]
