# Supplementary material for: Integrating High throughput Sequencing into Survey Design Reveals Turnip Yellows Virus and Soybean Dwarf Virus in Pea (Pisum Sativum) in the United Kingdom
Source: MDPI journal article supplement (doi:10.3390/v13122530), 2021-12-16
Supplement: s1 [file s1]

*Supplementary Table S3: Central estimates and 95% confidence intervals for prevalence estimates based on testing 15 7-plant pools and 15 1-plant pools*

| 7-plant<br>pools +ve | 1-plant<br>pools +ve | Prevalence (%) |                         |       |
|----------------------|----------------------|----------------|-------------------------|-------|
|                      |                      | Estimate       | 95% confidence interval |       |
| 0                    | 0                    | 0              | 0                       | 2.47  |
| 0                    | 1                    | 0.83           | 0.02                    | 3.37  |
| 0                    | 2                    | 1.67           | 0.21                    | 4.69  |
| 0                    | 3                    | 2.5            | 0.54                    | 6.18  |
| 0                    | 4                    | 3.33           | 0.98                    | 7.67  |
| 1                    | 0                    | 0.85           | 0.02                    | 4.66  |
| 1                    | 1                    | 1.71           | 0.21                    | 5.16  |
| 1                    | 2                    | 2.57           | 0.54                    | 6.25  |
| 1                    | 3                    | 3.42           | 0.98                    | 7.68  |
| 1                    | 4                    | 4.28           | 1.5                     | 9.18  |
| 2                    | 0                    | 1.76           | 0.24                    | 6.17  |
| 2                    | 1                    | 2.64           | 0.55                    | 6.81  |
| 2                    | 2                    | 3.52           | 0.98                    | 7.81  |
| 2                    | 3                    | 4.4            | 1.5                     | 9.2   |
| 2                    | 4                    | 5.28           | 2.1                     | 10.73 |
| 2                    | 5                    | 6.17           | 2.76                    | 12.35 |
| 3                    | 0                    | 2.71           | 0.63                    | 7.67  |
| 3                    | 1                    | 3.62           | 1.01                    | 8.43  |
| 3                    | 2                    | 4.53           | 1.51                    | 9.41  |
| 3                    | 3                    | 5.44           | 2.1                     | 10.78 |
| 3                    | 4                    | 6.35           | 2.76                    | 12.36 |
| 3                    | 5                    | 7.27           | 3.49                    | 14.05 |
| 4                    | 0                    | 3.72           | 1.14                    | 9.18  |
| 4                    | 1                    | 4.66           | 1.55                    | 10.07 |
| 4                    | 2                    | 5.6            | 2.11                    | 11.06 |
| 4                    | 3                    | 6.55           | 2.76                    | 12.43 |
| 4                    | 4                    | 7.49           | 3.49                    | 14.07 |
| 4                    | 5                    | 8.44           | 4.04                    | 15.39 |
| 4                    | 6                    | 9.4            | 4.61                    | 16.61 |
| 5                    | 0                    | 4.81           | 1.74                    | 10.73 |
| 5                    | 1                    | 5.78           | 2.19                    | 11.76 |
| 5                    | 2                    | 6.76           | 2.79                    | 12.8  |
| 5                    | 3                    | 7.74           | 3.5                     | 14.18 |
| 5                    | 4                    | 8.72           | 4.3                     | 15.89 |
| 5                    | 5                    | 9.71           | 4.97                    | 17.38 |
| 5                    | 6                    | 10.7           | 5.33                    | 18.09 |
| 6                    | 0                    | 5.97           | 2.43                    | 12.35 |
| 6                    | 1                    | 6.98           | 2.91                    | 13.53 |
| 6                    | 2                    | 8              | 3.55                    | 14.64 |
| 6                    | 3                    | 9.02           | 4.31                    | 16.06 |
| 6                    | 4                    | 10.05          | 4.97                    | 17.43 |
| 6                    | 5                    | 11.09          | 5.61                    | 18.75 |
| 6                    | 6                    | 12.13          | 6.38                    | 20.3  |
| 6                    | 7                    | 13.18          | 7.18                    | 21.98 |
| 7                    | 0                    | 7.22           | 3.2                     | 14.05 |
| 7                    | 1                    | 8.28           | 3.71                    | 15.39 |
| 7                    | 2                    | 9.35           | 4.39                    | 16.61 |
| 7                    | 3                    | 10.42          | 5.21                    | 18.08 |
| 7                    | 4                    | 11.5           | 5.99                    | 19.6  |

|    |    |       |       |       |
|----|----|-------|-------|-------|
| 7  | 5  | 12.59 | 6.72  | 21.08 |
| 7  | 6  | 13.69 | 7.55  | 22.75 |
| 7  | 7  | 14.8  | 7.99  | 23.66 |
| 8  | 0  | 8.59  | 4.05  | 15.86 |
| 8  | 1  | 9.7   | 4.61  | 17.37 |
| 8  | 2  | 10.83 | 5.33  | 18.73 |
| 8  | 3  | 11.96 | 6.2   | 20.3  |
| 8  | 4  | 13.1  | 7.1   | 21.98 |
| 8  | 5  | 14.26 | 7.56  | 22.81 |
| 8  | 6  | 15.43 | 8.46  | 24.64 |
| 8  | 7  | 16.6  | 9.39  | 26.56 |
| 8  | 8  | 17.79 | 9.91  | 27.65 |
| 9  | 0  | 10.09 | 5     | 17.84 |
| 9  | 1  | 11.27 | 5.62  | 19.52 |
| 9  | 2  | 12.46 | 6.38  | 21.05 |
| 9  | 3  | 13.67 | 7.31  | 22.75 |
| 9  | 4  | 14.89 | 7.99  | 23.92 |
| 9  | 5  | 16.12 | 8.88  | 25.61 |
| 9  | 6  | 17.38 | 9.89  | 27.65 |
| 9  | 7  | 18.64 | 10.49 | 28.84 |
| 9  | 8  | 19.93 | 11.31 | 30.51 |
| 9  | 9  | 21.23 | 12.28 | 32.52 |
| 10 | 0  | 11.76 | 6.03  | 19.96 |
| 10 | 1  | 13.02 | 6.74  | 21.85 |
| 10 | 2  | 14.29 | 7.58  | 23.66 |
| 10 | 3  | 15.59 | 8.46  | 25.29 |
| 10 | 4  | 16.91 | 9.39  | 26.94 |
| 10 | 5  | 18.25 | 10.33 | 28.66 |
| 10 | 6  | 19.61 | 11.27 | 30.51 |
| 10 | 7  | 20.99 | 12.27 | 32.52 |
| 10 | 8  | 22.4  | 13.33 | 34.75 |
| 10 | 9  | 23.83 | 14.5  | 37.23 |
| 11 | 0  | 13.64 | 7.18  | 22.29 |
| 11 | 1  | 15    | 8.09  | 24.63 |
| 11 | 2  | 16.39 | 8.93  | 26.56 |
| 11 | 3  | 17.8  | 9.91  | 28.49 |
| 11 | 4  | 19.25 | 10.98 | 30.44 |
| 11 | 5  | 20.72 | 12.1  | 32.5  |
| 11 | 6  | 22.23 | 13.25 | 34.74 |
| 11 | 7  | 23.77 | 14.46 | 37.23 |
| 11 | 8  | 25.34 | 14.5  | 37.25 |
| 11 | 9  | 26.95 | 15.79 | 40.04 |
| 11 | 10 | 28.6  | 17.23 | 43.25 |
| 12 | 0  | 15.8  | 8.77  | 25.51 |
| 12 | 1  | 17.3  | 9.57  | 27.62 |
| 12 | 2  | 18.84 | 10.49 | 29.9  |
| 12 | 3  | 20.41 | 11.56 | 32.22 |
| 12 | 4  | 22.03 | 12.79 | 34.63 |
| 12 | 5  | 23.69 | 14.13 | 37.19 |
| 12 | 6  | 25.41 | 14.5  | 37.64 |
| 12 | 7  | 27.17 | 15.79 | 40.2  |
| 12 | 8  | 28.99 | 17.23 | 43.31 |
| 12 | 9  | 30.88 | 18.46 | 46.18 |
| 12 | 10 | 32.82 | 19.94 | 49.53 |
| 12 | 11 | 34.83 | 20.81 | 51.57 |
| 13 | 0  | 18.36 | 10.41 | 28.83 |
| 13 | 1  | 20.05 | 11.31 | 31.14 |

|    |    |       |       |       |
|----|----|-------|-------|-------|
| 13 | 2  | 21.8  | 12.32 | 33.83 |
| 13 | 3  | 23.61 | 13.51 | 36.73 |
| 13 | 4  | 25.49 | 14.61 | 39.07 |
| 13 | 5  | 27.44 | 15.84 | 41.4  |
| 13 | 6  | 29.48 | 17.25 | 44.08 |
| 13 | 7  | 31.6  | 18.86 | 47.4  |
| 13 | 8  | 33.83 | 19.94 | 49.73 |
| 13 | 9  | 36.16 | 21.6  | 53.34 |
| 13 | 10 | 38.6  | 23.54 | 57.63 |
| 13 | 11 | 41.16 | 25.86 | 62.62 |
| 13 | 12 | 43.85 | 25.86 | 62.62 |
| 13 | 13 | 46.65 | 28.63 | 68.04 |
| 14 | 0  | 21.52 | 12.28 | 32.64 |
| 14 | 1  | 23.5  | 13.34 | 35.3  |
| 14 | 2  | 25.58 | 15.19 | 39.99 |
| 14 | 3  | 27.77 | 16.27 | 42.99 |
| 14 | 4  | 30.09 | 17.53 | 46.16 |
| 14 | 5  | 32.56 | 19.03 | 49.52 |
| 14 | 6  | 35.18 | 20.81 | 53.27 |
| 14 | 7  | 38    | 22.9  | 57.61 |
| 14 | 8  | 41.02 | 25.36 | 62.62 |
| 14 | 9  | 44.26 | 25.86 | 63.16 |
| 14 | 10 | 47.74 | 28.63 | 68.23 |
| 14 | 11 | 51.46 | 31.93 | 73.55 |
| 14 | 12 | 55.41 | 35.86 | 78.76 |
| 14 | 13 | 59.56 | 35.89 | 78.77 |
| 14 | 14 | 63.87 | 40.54 | 83.67 |
| 14 | 15 | 68.28 | 46.02 | 88.18 |
| 15 | 0  | 25.7  | 15.76 | 40.03 |
| 15 | 1  | 28.2  | 17.09 | 43.25 |
| 15 | 2  | 30.91 | 18.47 | 47.02 |
| 15 | 3  | 33.88 | 20.01 | 51.57 |
| 15 | 4  | 37.15 | 21.63 | 56.58 |
| 15 | 5  | 40.8  | 23.55 | 62.15 |
| 15 | 6  | 44.91 | 26.02 | 68.04 |
| 15 | 7  | 49.57 | 28.72 | 73.5  |
| 15 | 8  | 54.81 | 31.98 | 78.75 |
| 15 | 9  | 60.62 | 35.9  | 83.67 |
| 15 | 10 | 66.87 | 40.54 | 88.18 |
| 15 | 11 | 73.38 | 46.02 | 92.21 |
| 15 | 12 | 80.01 | 52.38 | 95.67 |
| 15 | 13 | 86.67 | 59.69 | 98.34 |
| 15 | 14 | 93.33 | 68.08 | 99.83 |
| 15 | 15 | 100   | 81.9  | 100   |
