# Supplementary material for: Integrating High throughput Sequencing into Survey Design Reveals Turnip Yellows Virus and Soybean Dwarf Virus in Pea (Pisum Sativum) in the United Kingdom
Source: Viruses. 2021 Dec 16;13(12):2530. doi: 10.3390/v13122530 (PMC8707713; doi:10.3390/v13122530)
Supplement: Supplementary file 1 [file viruses-13-02530-s001.zip]

Archive with 5 entries (5 files):
- Supplementary Figure S1 Central estimates and 95 confidence intervals for two different sizes of pools used to test 120 plants.pdf
- Supplementary Table S1 HTS and incidence results for site testing.pdf
- Supplementary Table S2. Table shows the reads per kilobase of transcript per million mapped reads (RKPM) for each sample tested by HTS SM.pdf
- Supplementary Table S3 Central estimates and 95 confidence intervals for prevalence estimates based on testing 15 7-plant pools and 15 1-plant pools.pdf
- Supplementary Table S4 Central estimates and 95 confidence intervals for prevalence estimates based on testing 30 4-plant pools.pdf
